# Supplementary material for: Supramolecular thermogels from branched PCL-containing polyurethanes
Source: Royal Society of Chemistry journal article supplement (doi:10.1039/d0ra07426h), 2020-01-01
Supplement: d0ra07426h1.pdf [file d0ra07426h1.pdf]

*Supporting Information*

## **Supramolecular thermogels from branched PCL-containing polyurethanes**

Qianyu Lin<sup>[b]</sup>, Jason Y. C. Lim<sup>[a]</sup>, Kun Xue<sup>[a]</sup>, Celestine P. T. Chee<sup>[a]</sup>, Xian Jun Loh<sup>\*[a]</sup>

---

[a] Prof. (Dr.), X.J., Loh\*, Dr. J.Y.C. Lim, Dr. K. Xue, C. P. T. Chee  
Soft Materials Department  
Institute of Materials Research and Engineering, Agency for Science, Technology and Research (A\*STAR)  
Address: 2 Fusionopolis Way, Innovis, Singapore 138634  
E-mail: [lohxj@imre.a-star.edu.sg](mailto:lohxj@imre.a-star.edu.sg)

[b] Q., Lin  
NUS Graduate School for Integrative Sciences and Engineering  
National University of Singapore  
21 Lower Kent Ridge Rd, Singapore 119077

## S1. Degree of Discrimination between PPG and PEG blocks during Polyurethane Synthesis

**Table S1.** Relative Integration of PPG and HMDI resonances at different durations of reaction

| Duration/ min | Relative <sup>1</sup> H NMR Integration |                     | Mole ratio |      |
|---------------|-----------------------------------------|---------------------|------------|------|
|               | PPG <sup>[a]</sup>                      | HMDI <sup>[b]</sup> | PPG        | HMDI |
| 10            | 7.31                                    | 1                   | 0.287      | 1    |
| 15            | 7.49                                    | 1                   | 0.294      | 1    |
| 20            | 7.36                                    | 1                   | 0.289      | 1    |
| 25            | 7.43                                    | 1                   | 0.291      | 1    |
| 30            | 7.36                                    | 1                   | 0.289      | 1    |
| 40            | 7.69                                    | 1                   | 0.302      | 1    |
| 50            | 7.49                                    | 1                   | 0.294      | 1    |
| 60            | 7.43                                    | 1                   | 0.291      | 1    |
| 90            | 7.33                                    | 1                   | 0.287      | 1    |
| 105           | 7.39                                    | 1                   | 0.290      | 1    |
| 120           | 7.51                                    | 1                   | 0.295      | 1    |
| 180           | 7.56                                    | 1                   | 0.296      | 1    |
| 210           | 7.56                                    | 1                   | 0.296      | 1    |
| 240           | 7.71                                    | 1                   | 0.302      | 1    |
| 300           | 7.76                                    | 1                   | 0.304      | 1    |
| 360           | 7.62                                    | 1                   | 0.299      | 1    |

[a] Resonance at 1.10-1.15 ppm [b] Resonance at 3.10-3.15 ppm

## S2. CMC determination for Thermogelling Polyurethanes

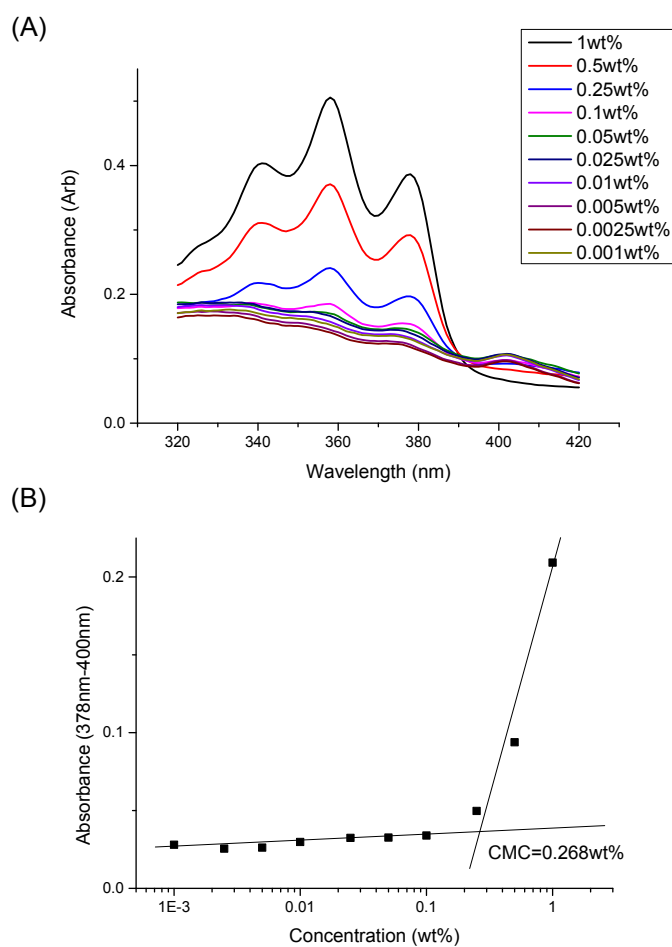

**Figure S1.** (A) UV-Vis absorbance spectra of DPH dye at different concentrations of polymer 1P30-1h at 15°C; (B) Difference in DPH absorbance at 378 and 400 nm as a function of concentration of 1P30-1h at 15°C. The CMC was determined by the intersection of the extrapolated linear best fit lines at low and high concentrations of polymer.

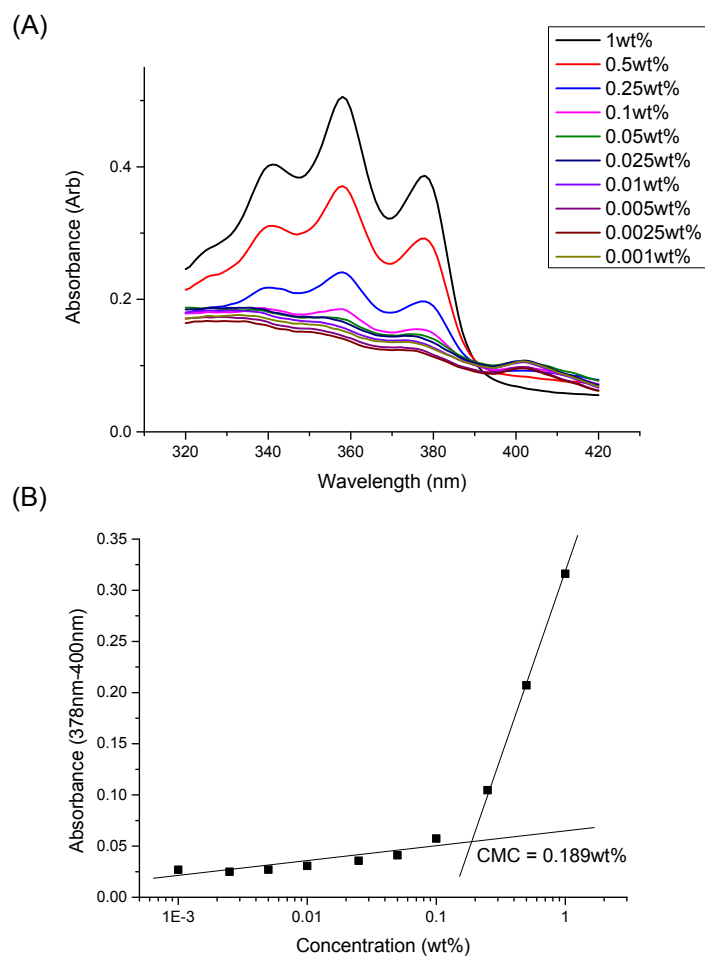

**Figure S2.** (A) UV-Vis absorbance spectra of DPH dye at different concentrations of polymer 1P30-1h at 25°C; (B) Difference in DPH absorbance at 378 and 400 nm as a function of concentration of 1P30-1h at 25°C. The CMC was determined by the intersection of the extrapolated linear best fit lines at low and high concentrations of polymer.

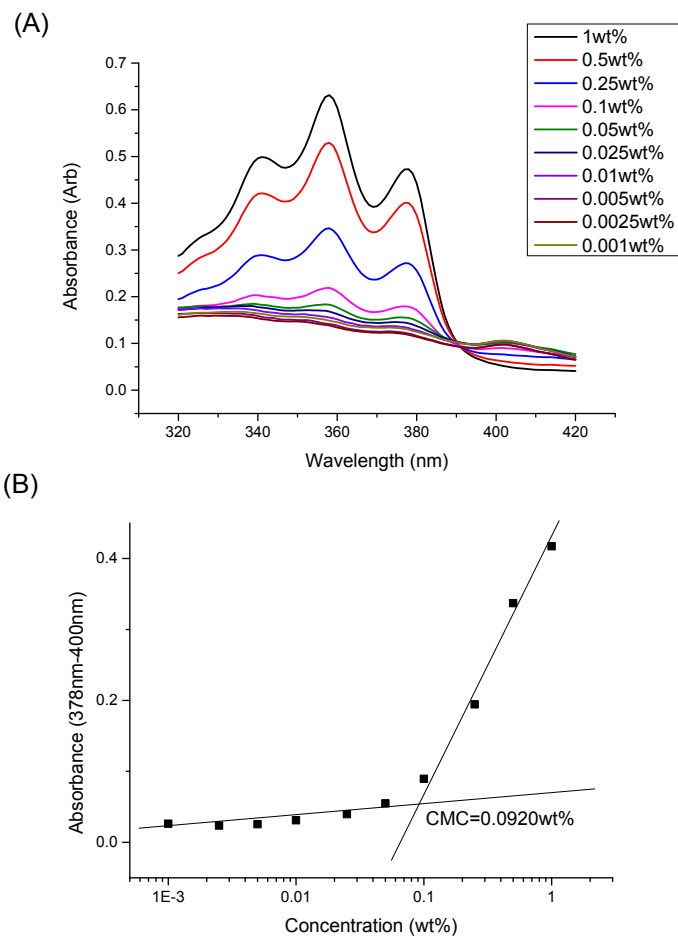

**Figure S3.** (A) UV-Vis absorbance spectra of DPH dye at different concentrations of polymer 1P30-1h at 35°C; (B) Difference in DPH absorbance at 378 and 400 nm as a function of concentration of 1P30-1h at 35°C. The CMC was determined by the intersection of the extrapolated linear best fit lines at low and high concentrations of polymer.

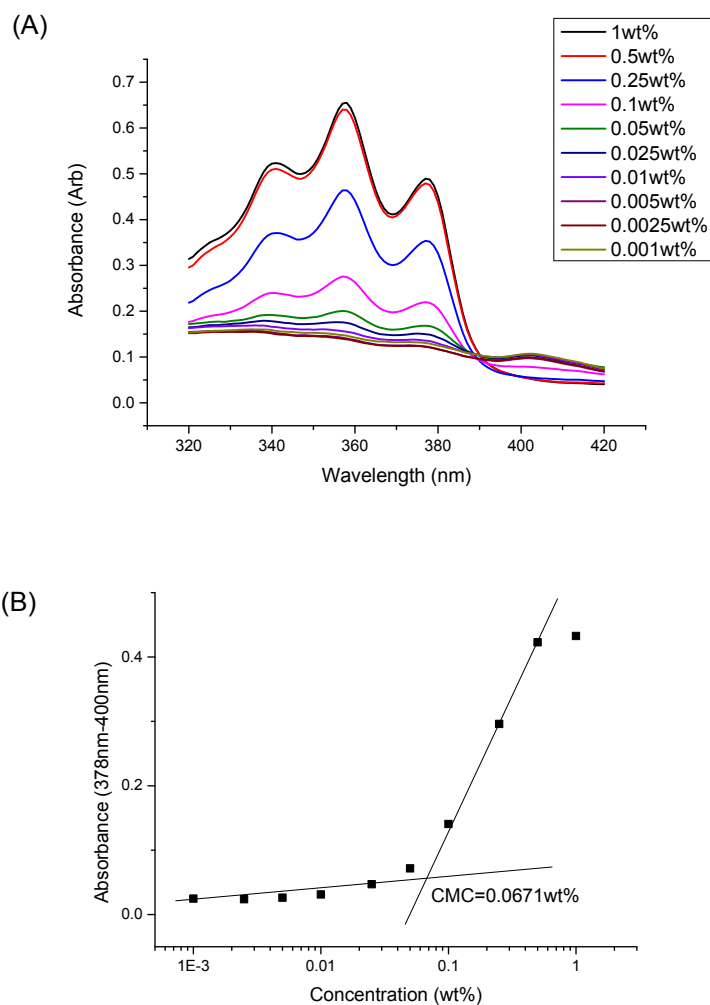

**Figure S4.** (A) UV-Vis absorbance spectra of DPH dye at different concentrations of polymer 1P30-1h at 45°C; (B) Difference in DPH absorbance at 378 and 400 nm as a function of concentration of 1P30-1h at 45°C. The CMC was determined by the intersection of the extrapolated linear best fit lines at low and high concentrations of polymer.

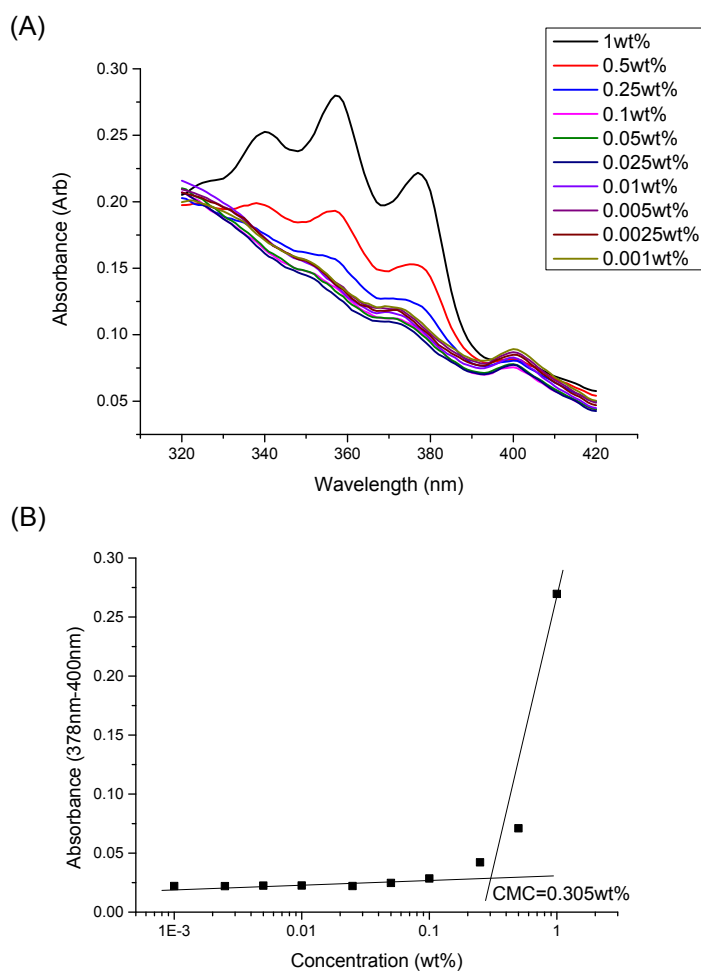

**Figure S5.** (A) UV-Vis absorbance spectra of DPH dye at different concentrations of polymer 1P30-2h at 15°C; (B) Difference in DPH absorbance at 378 and 400 nm as a function of concentration of 1P30-2h at 15°C. The CMC was determined by the intersection of the extrapolated linear best fit lines at low and high concentrations of polymer.

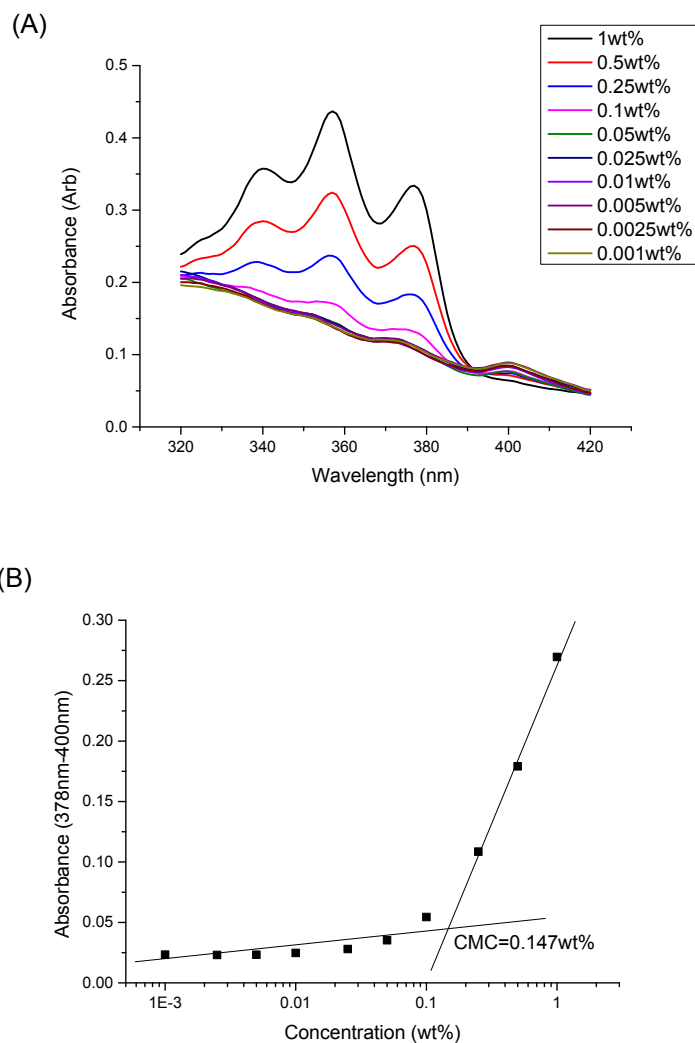

**Figure S6.** (A) UV-Vis absorbance spectra of DPH dye at different concentrations of polymer 1P30-2h at 25°C; (B) Difference in DPH absorbance at 378 and 400 nm as a function of concentration of 1P30-2h at 25°C. The CMC was determined by the intersection of the extrapolated linear best fit lines at low and high concentrations of polymer.



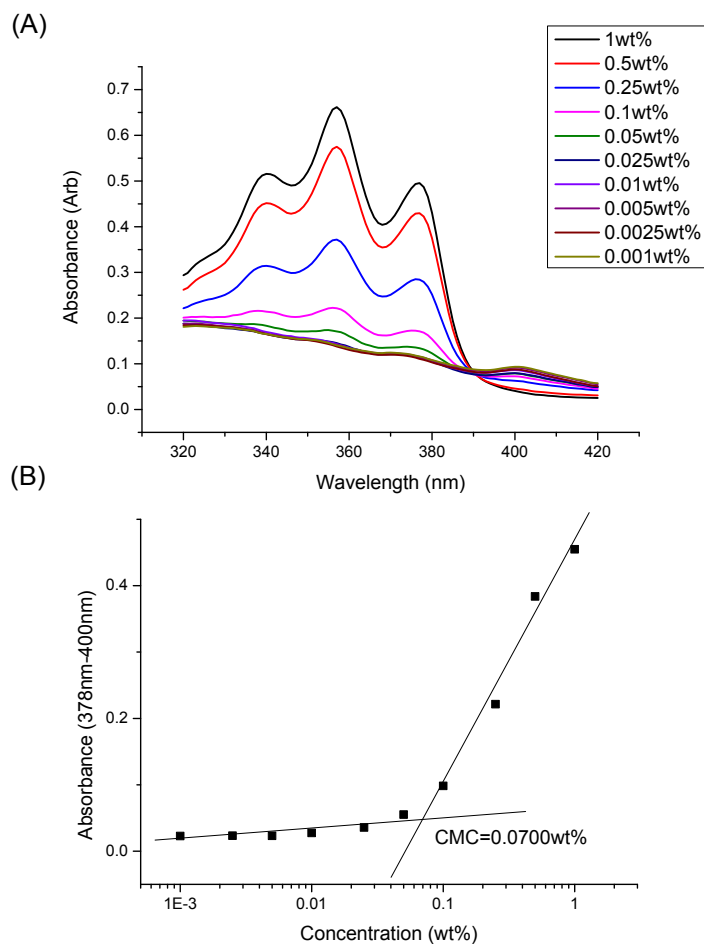

**Figure S7.** (A) UV-Vis absorbance spectra of DPH dye at different concentrations of polymer 1P30-2h at 35°C; (B) Difference in DPH absorbance at 378 and 400 nm as a function of concentration of 1P30-2h at 35°C. The CMC was determined by the intersection of the extrapolated linear best fit lines at low and high concentrations of polymer.

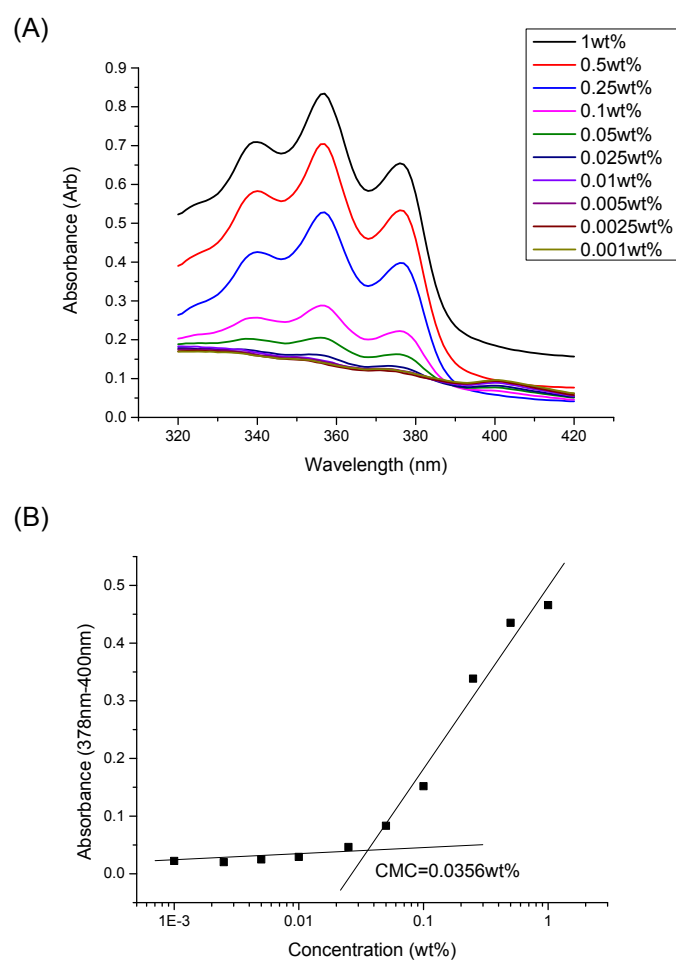

**Figure S8.** (A) UV-Vis absorbance spectra of DPH dye at different concentrations of polymer 1P30-2h at 45°C; (B) Difference in DPH absorbance at 378 and 400 nm as a function of concentration of 1P30-2h at 45°C. The CMC was determined by the intersection of the extrapolated linear best fit lines at low and high concentrations of polymer.

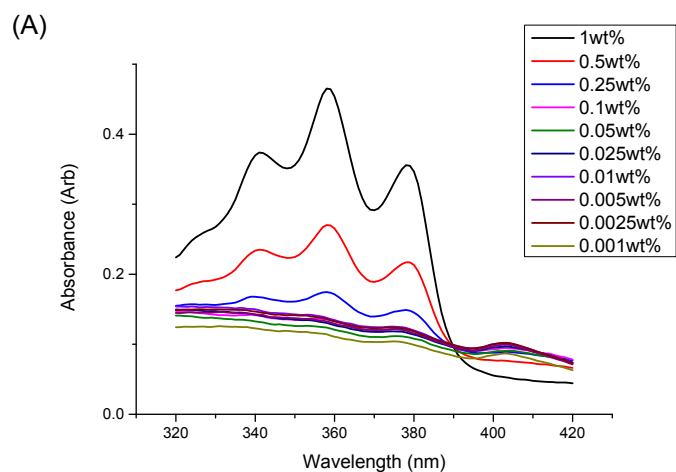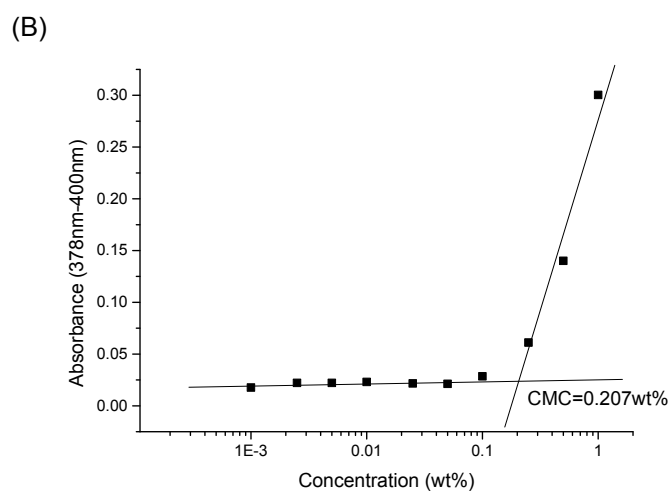

**Figure S9.** (A) UV-Vis absorbance spectra of DPH dye at different concentrations of polymer 1P30-3h at 15°C; (B) Difference in DPH absorbance at 378 and 400 nm as a function of concentration of 1P30-3h at 15°C. The CMC was determined by the intersection of the extrapolated linear best fit lines at low and high concentrations of polymer.

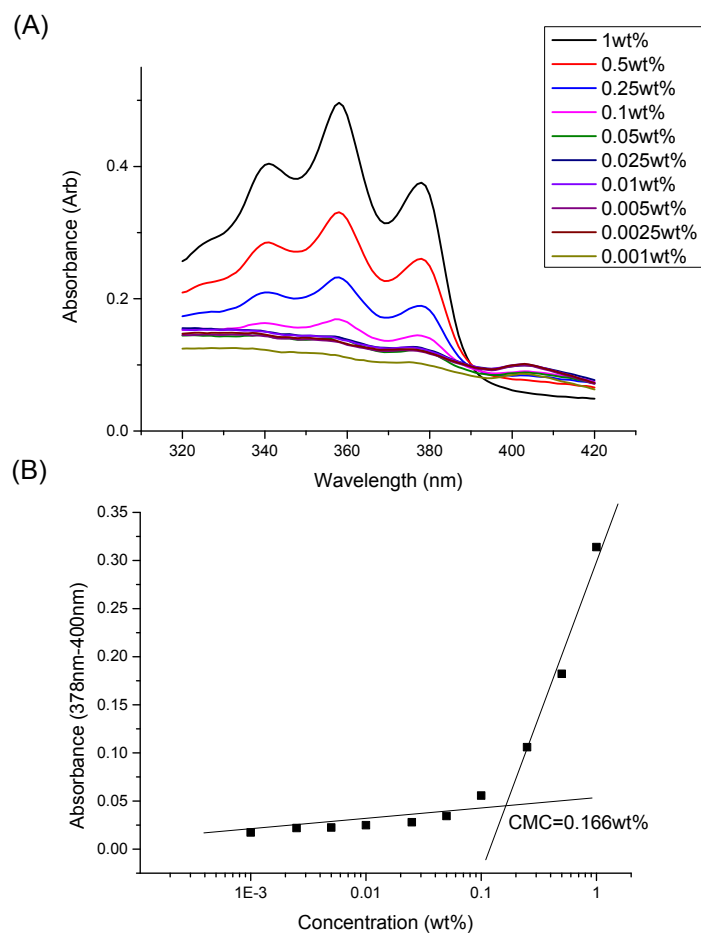

**Figure S10.** (A) UV-Vis absorbance spectra of DPH dye at different concentrations of polymer 1P30-3h at 25°C; (B) Difference in DPH absorbance at 378 and 400 nm as a function of concentration of 1P30-3h at 25°C. The CMC was determined by the intersection of the extrapolated linear best fit lines at low and high concentrations of polymer.

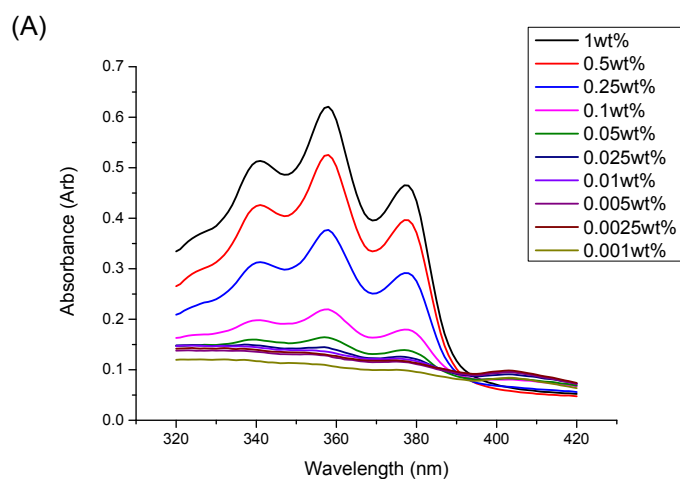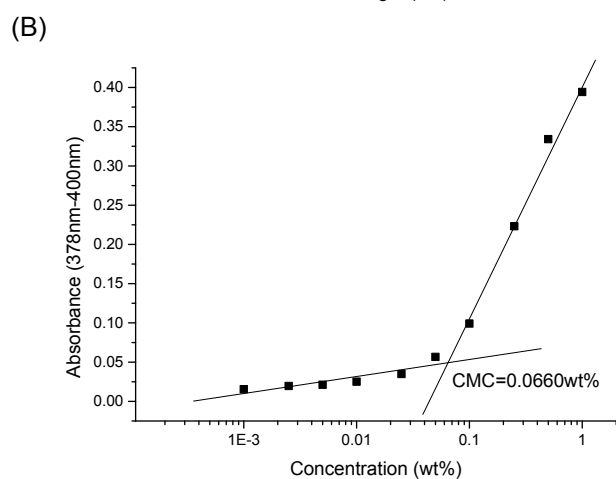

**Figure S11.** (A) UV-Vis absorbance spectra of DPH dye at different concentrations of polymer 1P30-3h at 35°C; (B) Difference in DPH absorbance at 378 and 400 nm as a function of concentration of 1P30-3h at 35°C. The CMC was determined by the intersection of the extrapolated linear best fit lines at low and high concentrations of polymer.

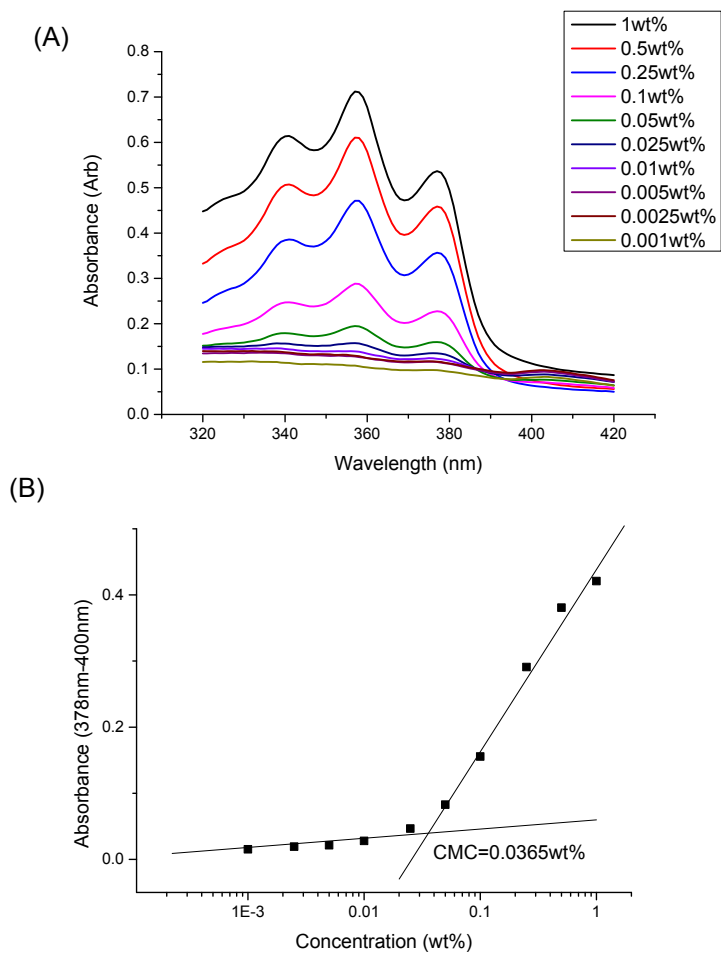

**Figure S12.** (A) UV-Vis absorbance spectra of DPH dye at different concentrations of polymer 1P30-3h at 45°C; (B) Difference in DPH absorbance at 378 and 400 nm as a function of concentration of 1P30-3h at 45°C. The CMC was determined by the intersection of the extrapolated linear best fit lines at low and high concentrations of polymer.

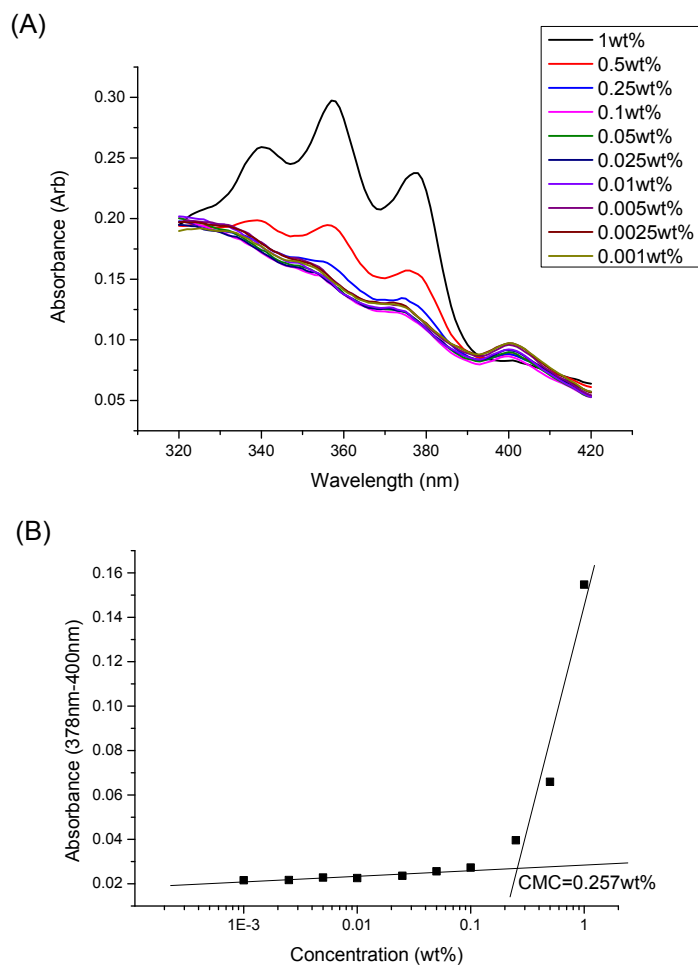

**Figure S13.** (A) UV-Vis absorbance spectra of DPH dye at different concentrations of polymer 1P35-2h at 15°C; (B) Difference in DPH absorbance at 378 and 400 nm as a function of concentration of 1P35-2h at 15°C. The CMC was determined by the intersection of the extrapolated linear best fit lines at low and high concentrations of polymer.

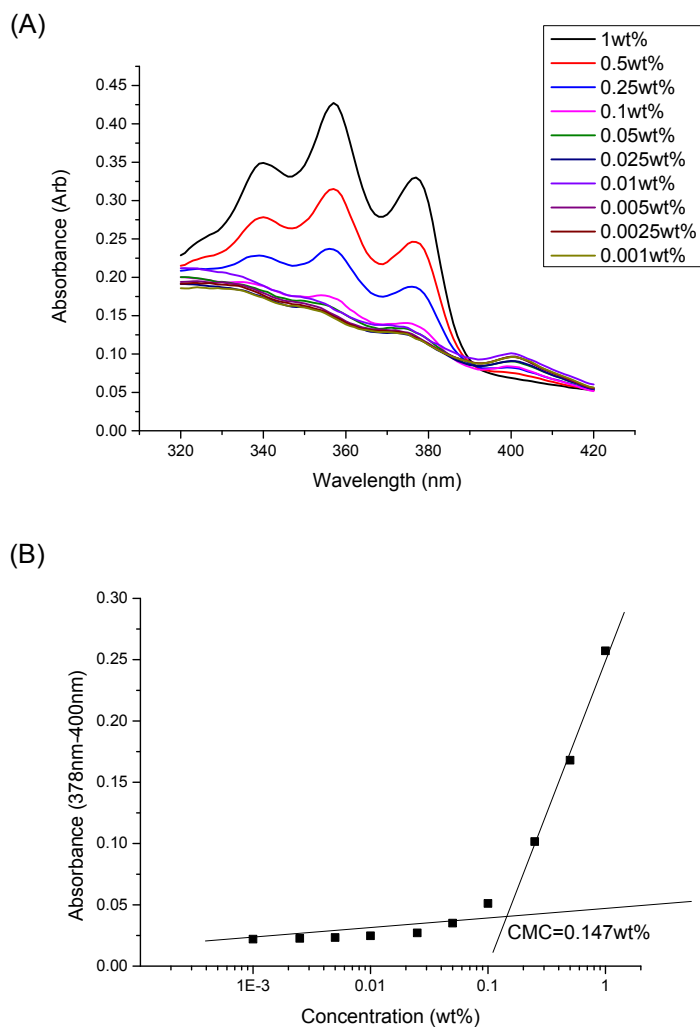

**Figure S14.** (A) UV-Vis absorbance spectra of DPH dye at different concentrations of polymer 1P35-2h at 25°C; (B) Difference in DPH absorbance at 378 and 400 nm as a function of concentration of 1P35-2h at 25°C. The CMC was determined by the intersection of the extrapolated linear best fit lines at low and high concentrations of polymer.



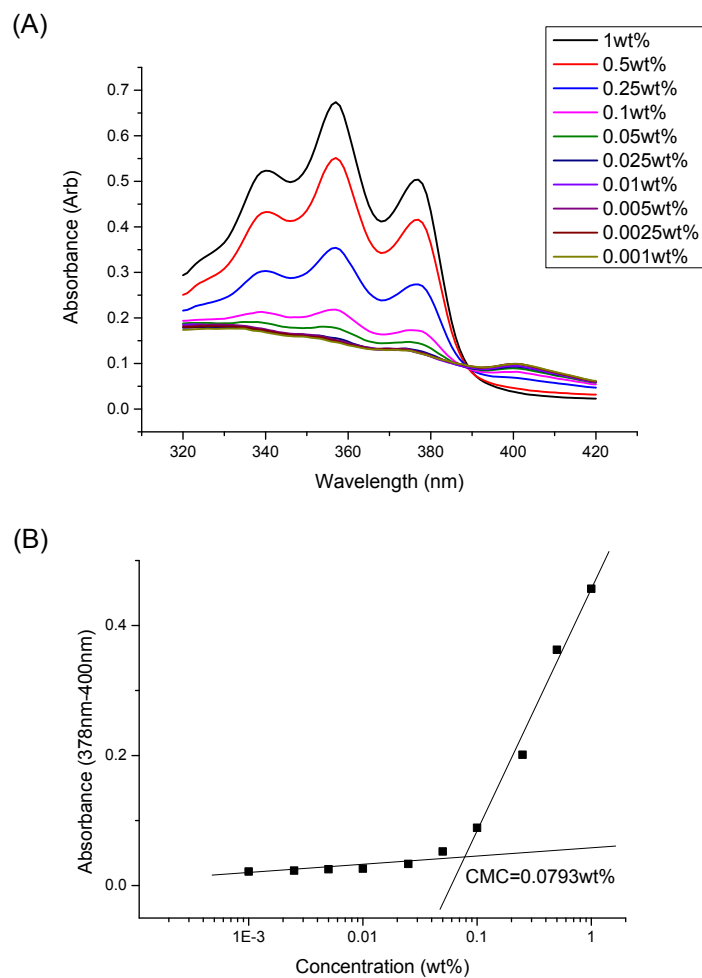

**Figure S15.** (A) UV-Vis absorbance spectra of DPH dye at different concentrations of polymer 1P35-2h at 35°C; (B) Difference in DPH absorbance at 378 and 400 nm as a function of concentration of 1P35-2h at 35°C. The CMC was determined by the intersection of the extrapolated linear best fit lines at low and high concentrations of polymer.

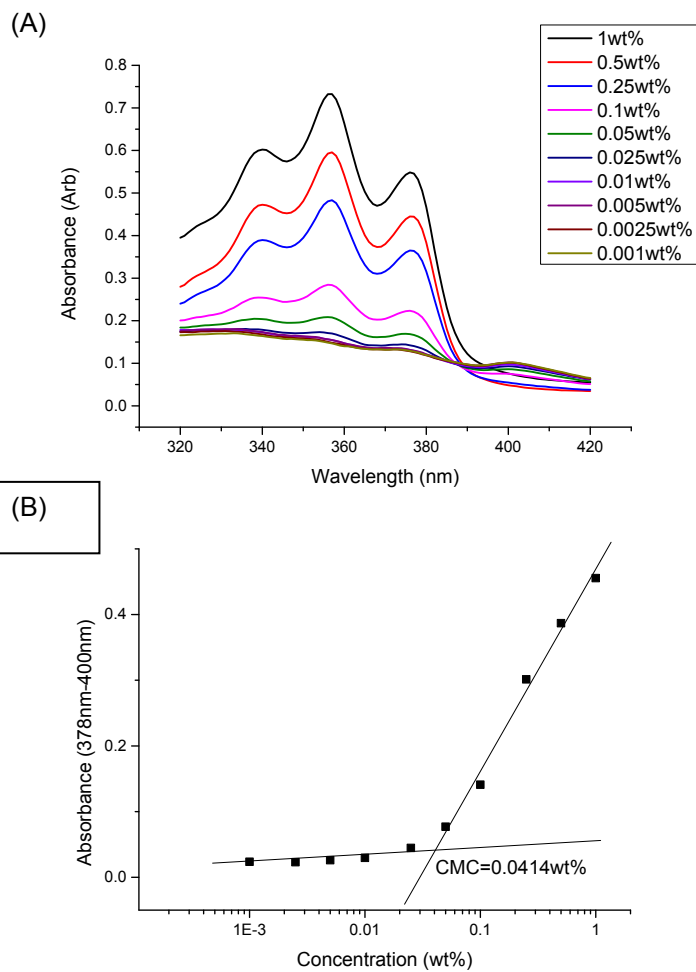

**Figure S16.** (A) UV-Vis absorbance spectra of DPH dye at different concentrations of polymer 1P35-2h at 45°C; (B) Difference in DPH absorbance at 378 and 400 nm as a function of concentration of 1P35-2h at 45°C. The CMC was determined by the intersection of the extrapolated linear best fit lines at low and high concentrations of polymer.

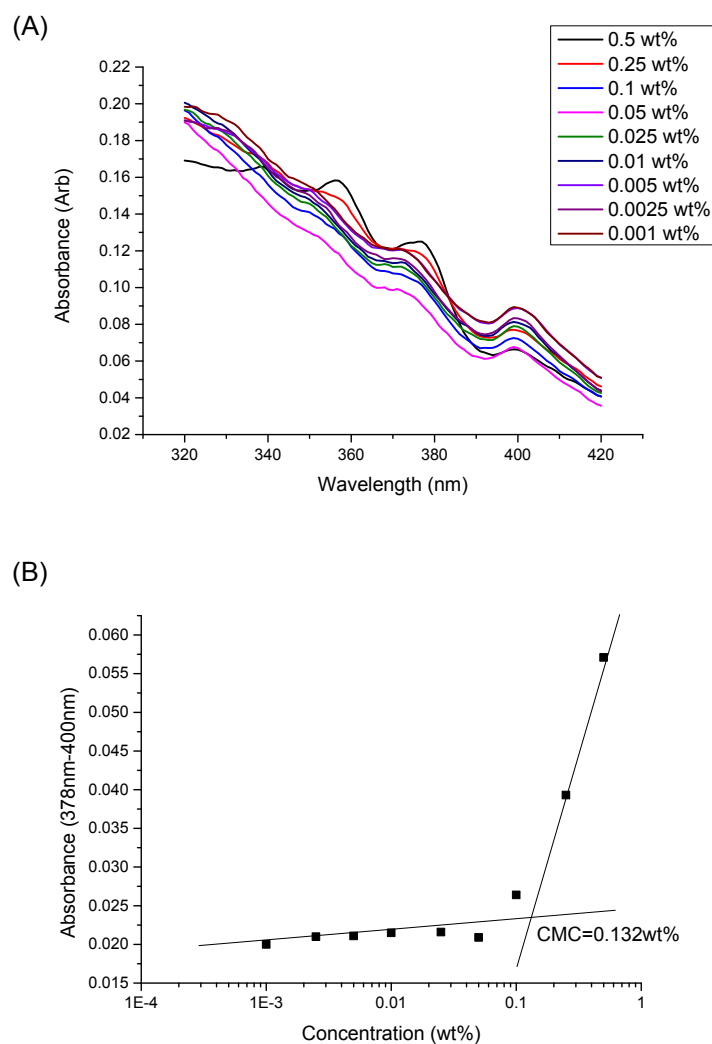

**Figure S17.** (A) UV-Vis absorbance spectra of DPH dye at different concentrations of polymer 1P35-3h at 15°C; (B) Difference in DPH absorbance at 378 and 400 nm as a function of concentration of 1P35-3h at 15°C. The CMC was determined by the intersection of the extrapolated linear best fit lines at low and high concentrations of polymer.

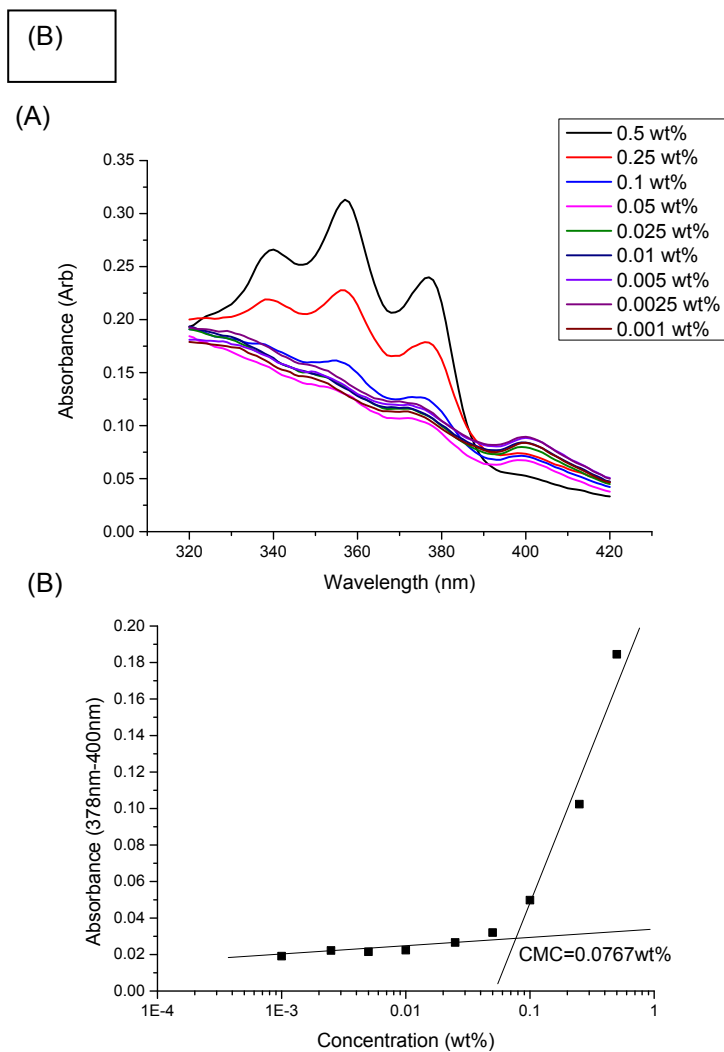

**Figure S18.** (A) UV-Vis absorbance spectra of DPH dye at different concentrations of polymer 1P35-3h at 25°C; (B) Difference in DPH absorbance at 378 and 400 nm as a function of concentration of 1P35-3h at 25°C. The CMC was determined by the intersection of the extrapolated linear best fit lines at low and high concentrations of polymer.

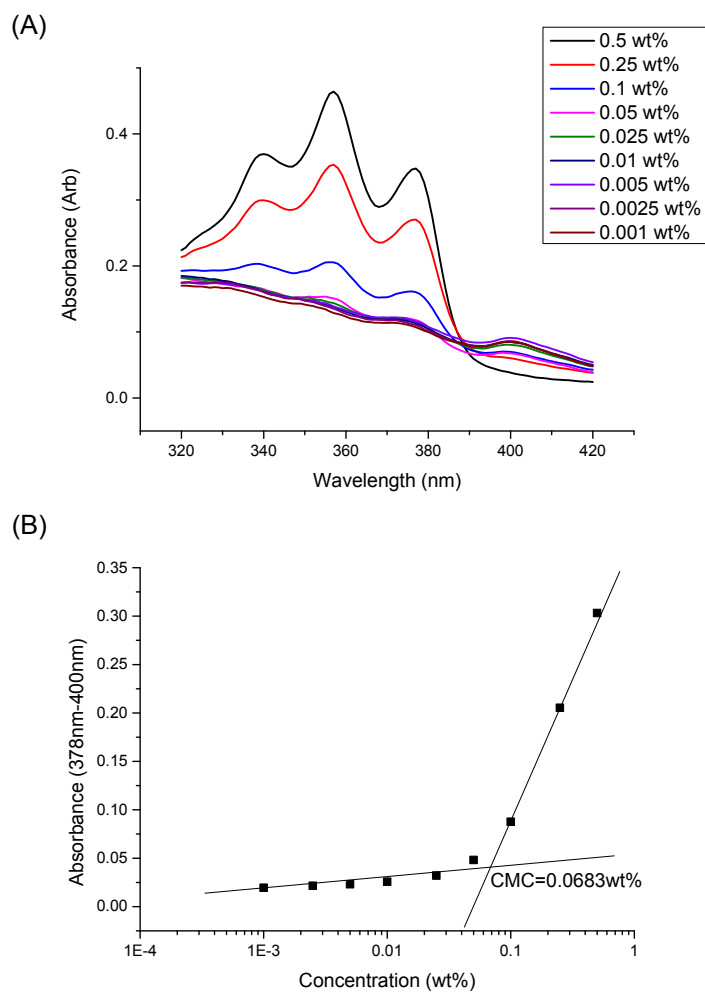

**Figure S19.** (A) UV-Vis absorbance spectra of DPH dye at different concentrations of polymer 1P35-3h at 35°C; (B) Difference in DPH absorbance at 378 and 400 nm as a function of concentration of 1P35-3h at 35°C. The CMC was determined by the intersection of the extrapolated linear best fit lines at low and high concentrations of polymer.

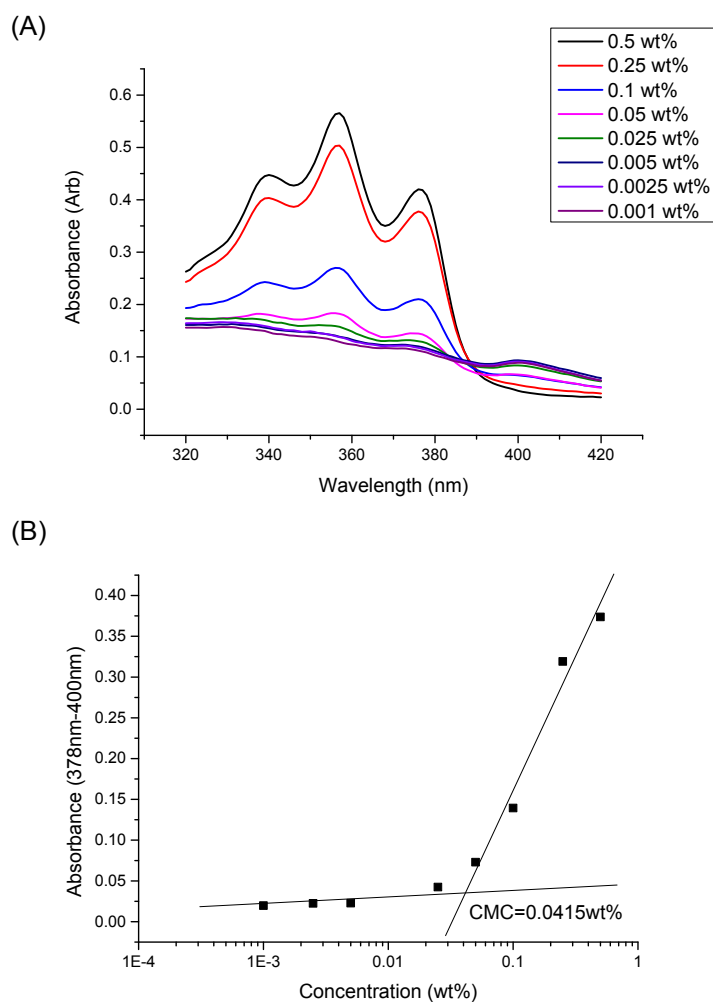

**Figure S20.** (A) UV-Vis absorbance spectra of DPH dye at different concentrations of polymer 1P35-3h at 45°C; (B) Difference in DPH absorbance at 378 and 400 nm as a function of concentration of 1P35-3h at 45°C. The CMC was determined by the intersection of the extrapolated linear best fit lines at low and high concentrations of polymer.

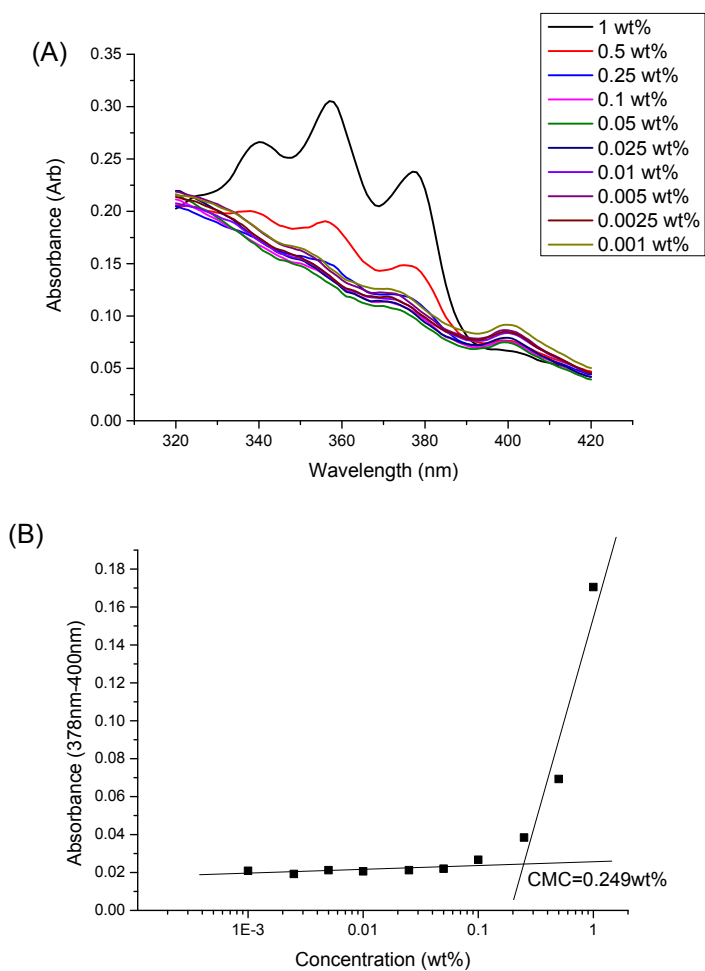

**Figure S21.** (A) UV-Vis absorbance spectra of DPH dye at different concentrations of polymer 1P35-4h at 15°C; (B) Difference in DPH absorbance at 378 and 400 nm as a function of concentration of 1P35-4h at 15°C. The CMC was determined by the intersection of the extrapolated linear best fit lines at low and high concentrations of polymer.

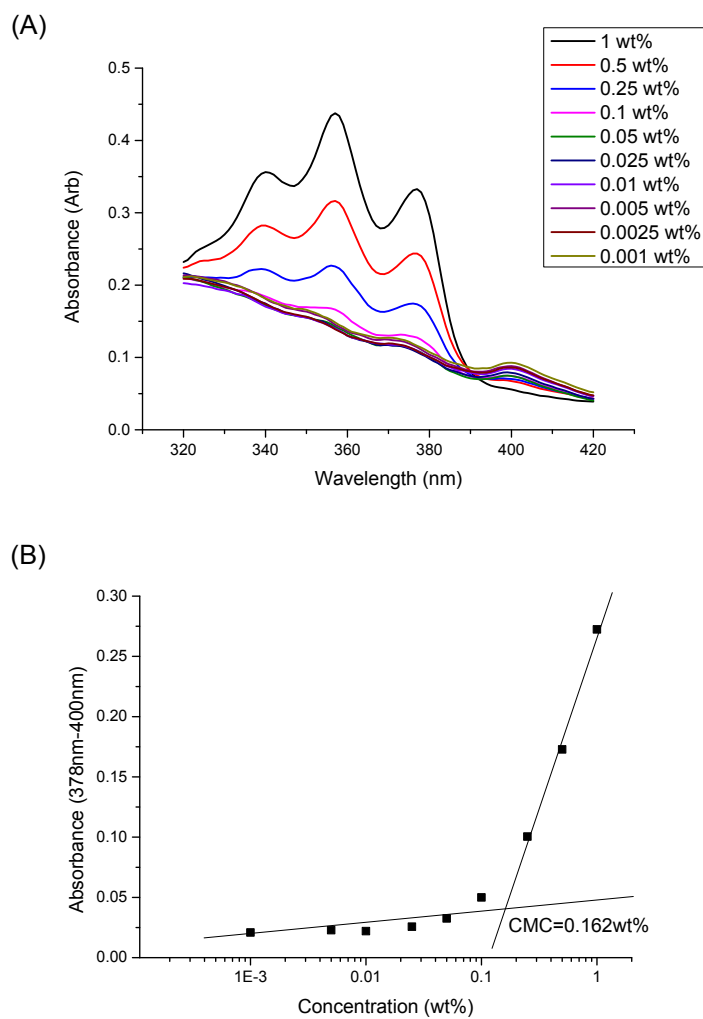

**Figure S22.** (A) UV-Vis absorbance spectra of DPH dye at different concentrations of polymer 1P35-4h at 25°C; (B) Difference in DPH absorbance at 378 and 400 nm as a function of concentration of 1P35-4h at 25°C. The CMC was determined by the intersection of the extrapolated linear best fit lines at low and high concentrations of polymer.



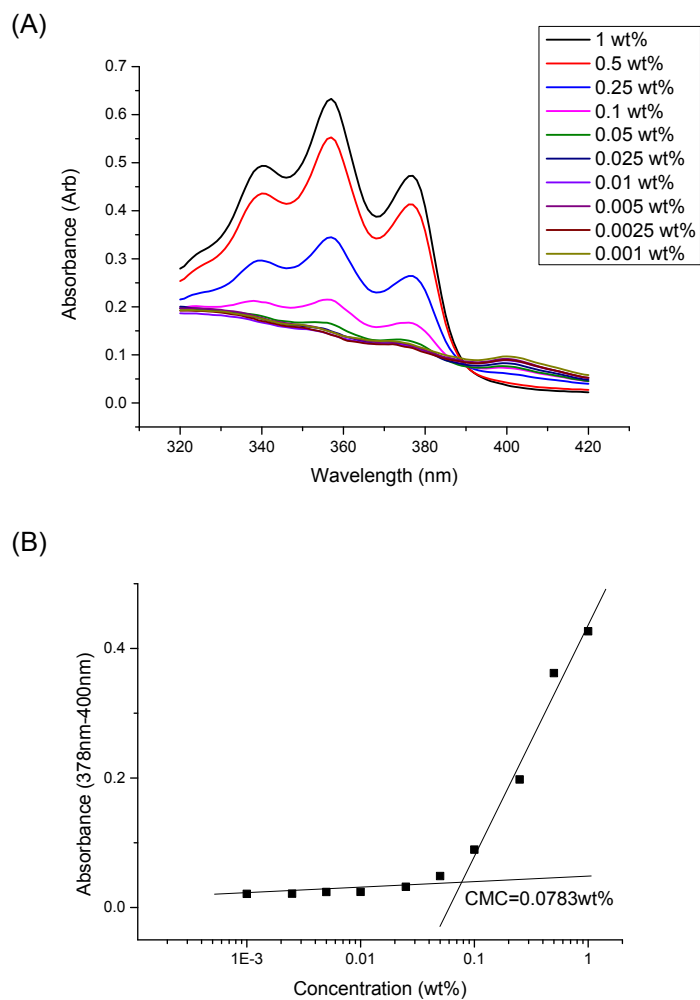

**Figure S23.** (A) UV-Vis absorbance spectra of DPH dye at different concentrations of polymer 1P35-4h at 35°C; (B) Difference in DPH absorbance at 378 and 400 nm as a function of concentration of 1P35-4h at 35°C. The CMC was determined by the intersection of the extrapolated linear best fit lines at low and high concentrations of polymer.

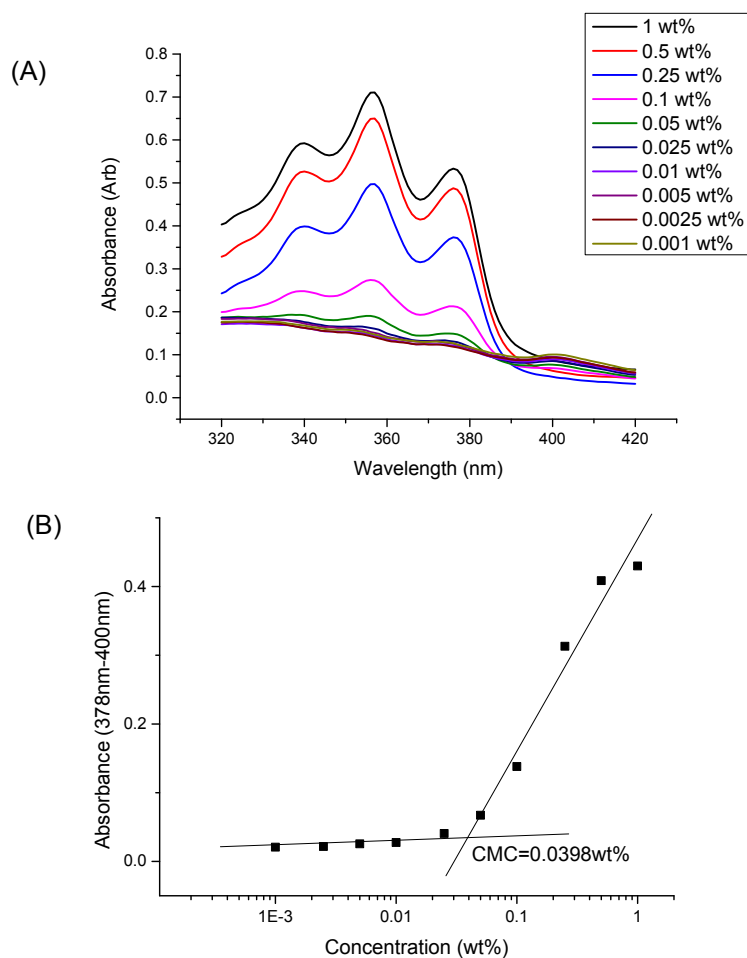

**Figure S24.** (A) UV-Vis absorbance spectra of DPH dye at different concentrations of polymer 1P35-4h at 45°C; (B) Difference in DPH absorbance at 378 and 400 nm as a function of concentration of 1P35-4h at 45°C. The CMC was determined by the intersection of the extrapolated linear best fit lines at low and high concentrations of polymer.

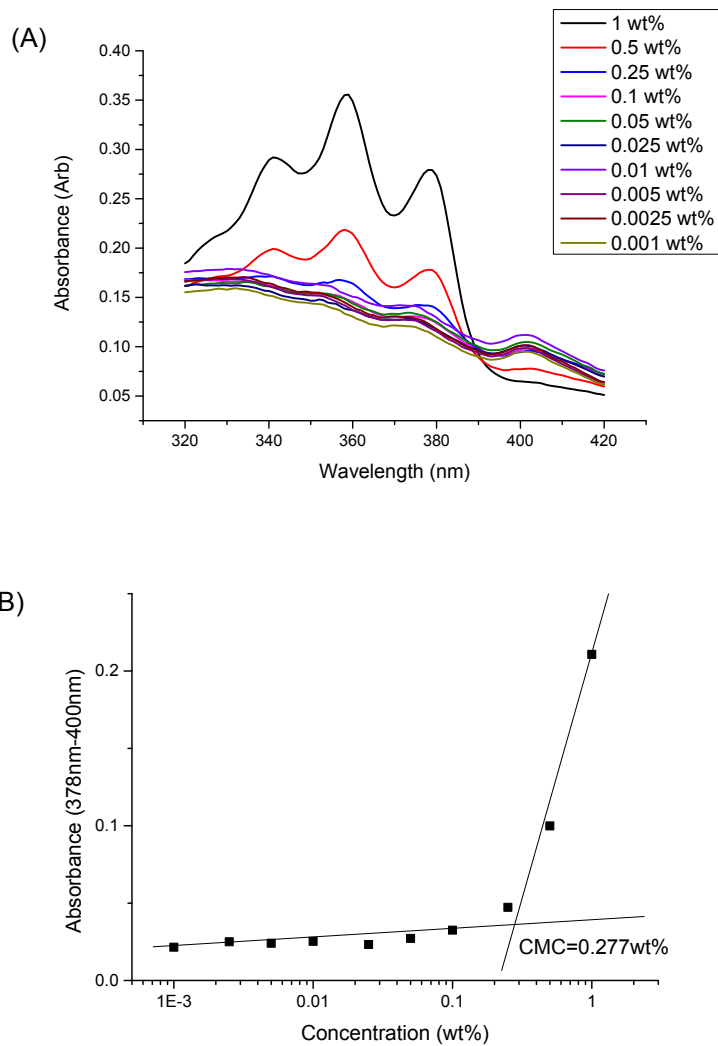

**Figure S25.** (A) UV-Vis absorbance spectra of DPH dye at different concentrations of polymer 1P40-1h at 15°C; (B) Difference in DPH absorbance at 378 and 400 nm as a function of concentration of 1P40-1h at 15°C. The CMC was determined by the intersection of the extrapolated linear best fit lines at low and high concentrations of polymer.

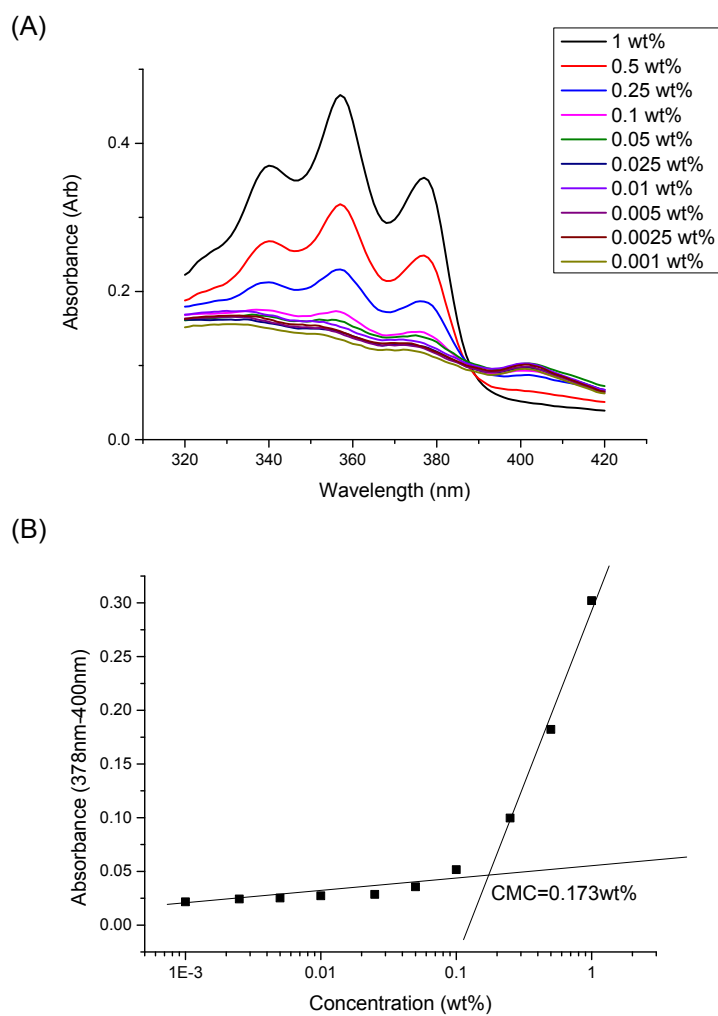

**Figure S26.** (A) UV-Vis absorbance spectra of DPH dye at different concentrations of polymer 1P40-1h at 25°C; (B) Difference in DPH absorbance at 378 and 400 nm as a function of concentration of 1P40-1h at 25°C. The CMC was determined by the intersection of the extrapolated linear best fit lines at low and high concentrations of polymer.

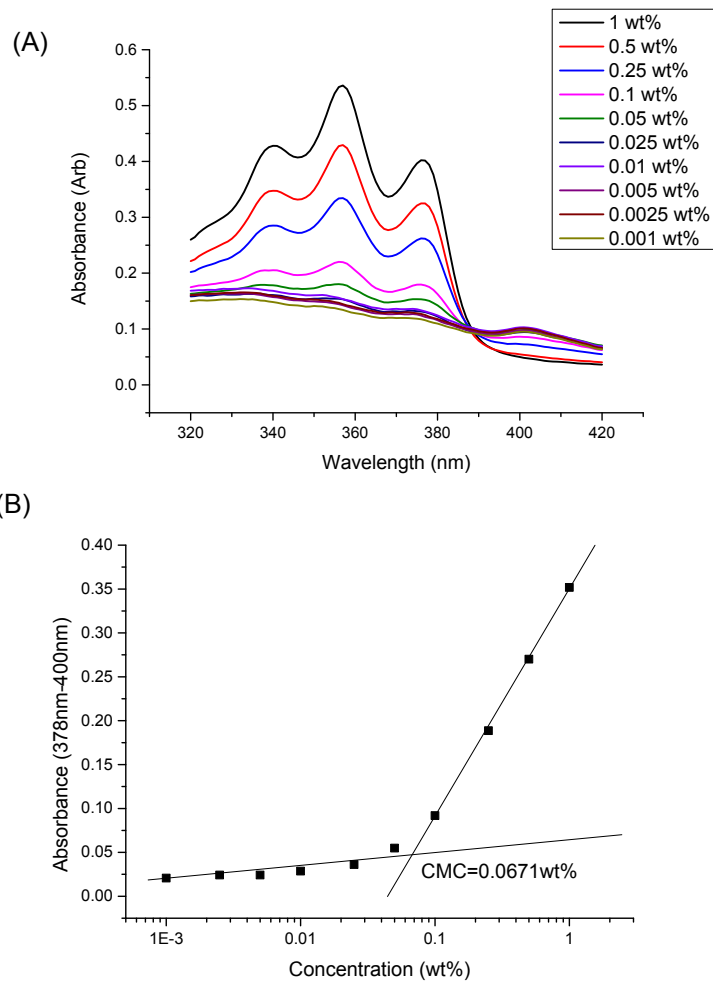

**Figure S27.** (A) UV-Vis absorbance spectra of DPH dye at different concentrations of polymer 1P40-1h at 35°C; (B) Difference in DPH absorbance at 378 and 400 nm as a function of concentration of 1P40-1h at 35°C. The CMC was determined by the intersection of the extrapolated linear best fit lines at low and high concentrations of polymer.

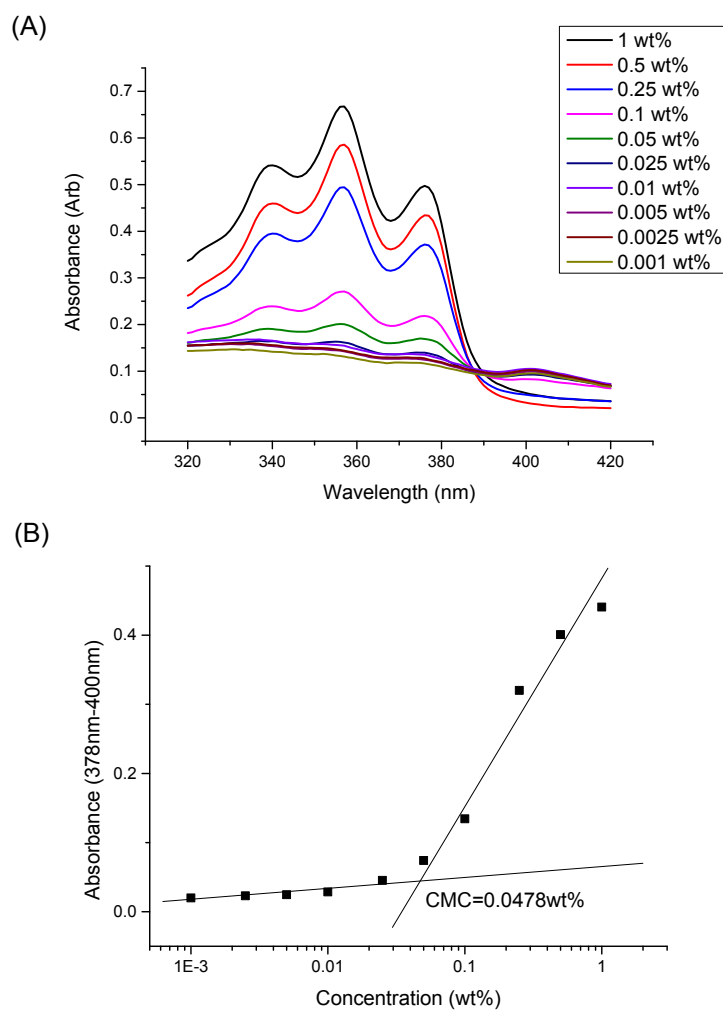

**Figure S28.** (A) UV-Vis absorbance spectra of DPH dye at different concentrations of polymer 1P40-1h at 45°C; (B) Difference in DPH absorbance at 378 and 400 nm as a function of concentration of 1P40-1h at 45°C. The CMC was determined by the intersection of the extrapolated linear best fit lines at low and high concentrations of polymer.

### S3. Thermodynamics of Micellization for Thermogelling Polyurethanes

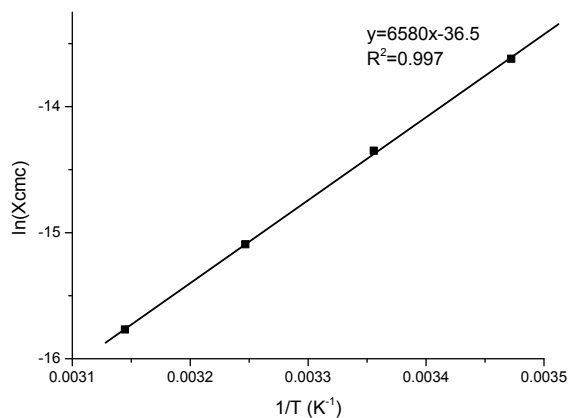

**Figure S29.** Arrhenius plot of  $\ln(X_{CMC})$  as a function of  $T^{-1}/K^{-1}$  for 1P30-2h.

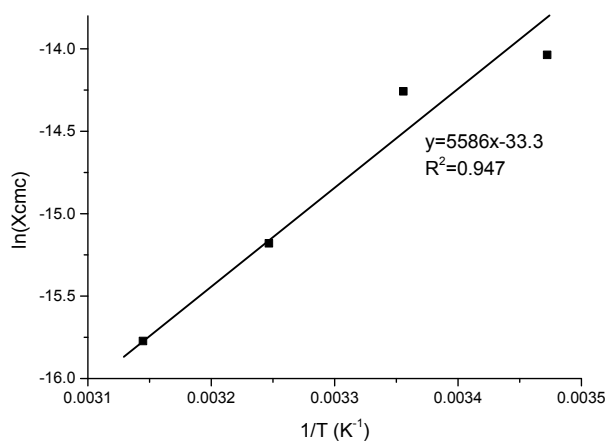

**Figure S30.** Arrhenius plot of  $\ln(X_{CMC})$  as a function of  $T^{-1}/K^{-1}$  for 1P30-3h.

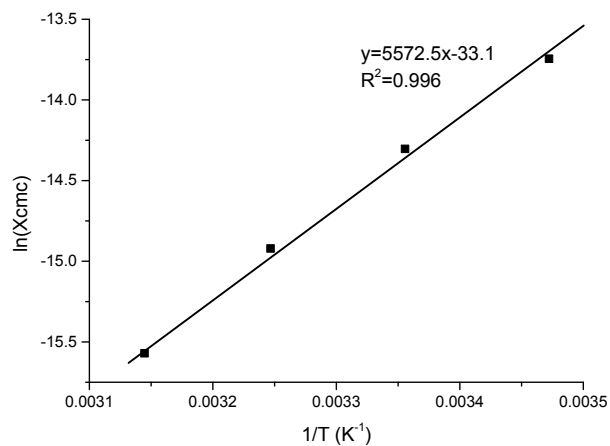

**Figure S31.** Arrhenius plot of  $\ln(X_{CMC})$  as a function of  $T^{-1}/K^{-1}$  for 1P35-2h.

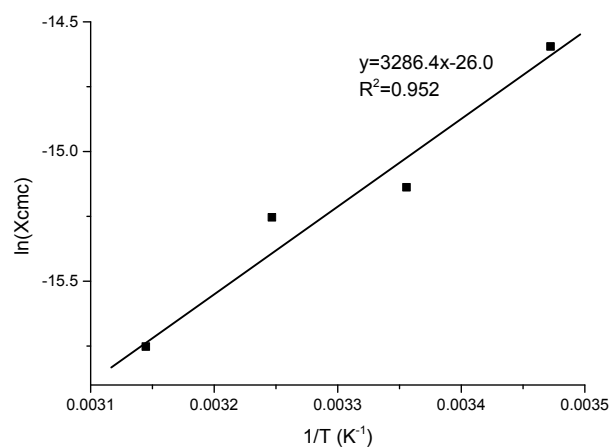

**Figure S32.** Arrhenius plot of  $\ln(X_{CMC})$  as a function of  $T^{-1}/ K^{-1}$  for 1P35-3h.

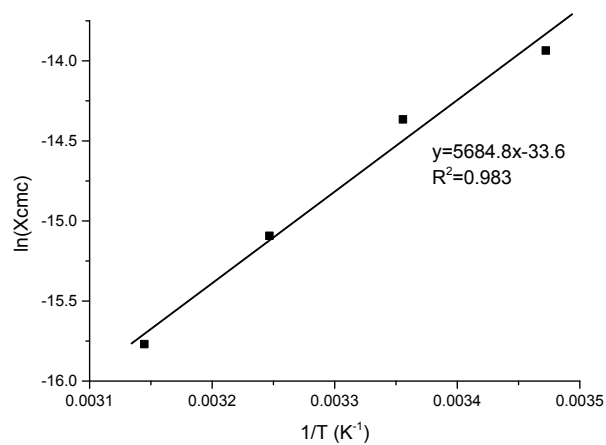

**Figure S33.** Arrhenius plot of  $\ln(X_{CMC})$  as a function of  $T^{-1}/ K^{-1}$  for 1P35-4h.

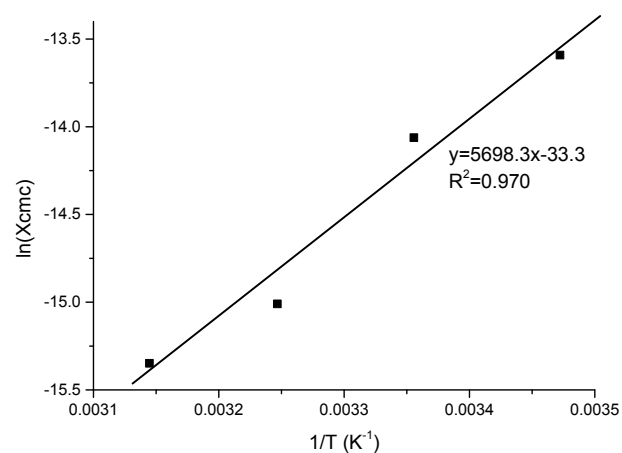

**Figure S34.** Arrhenius plot of  $\ln(X_{CMC})$  as a function of  $T^{-1}/ K^{-1}$  for 1P40-1h.



#### S4. Temperature-sweep Rheology of Thermogelling Polyurethane Solutions

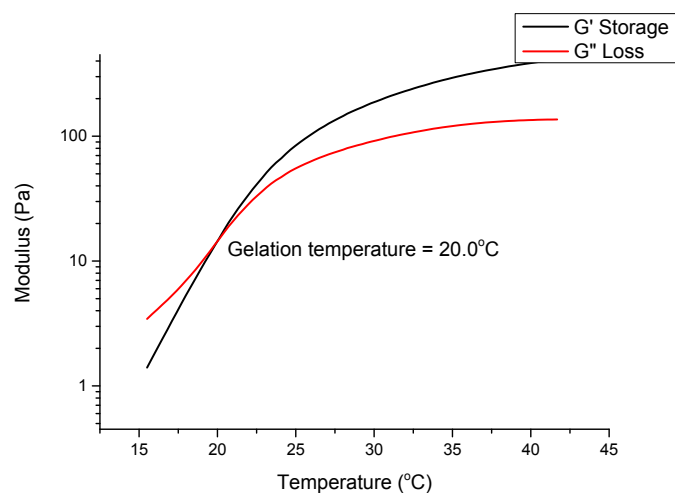

**Figure S35.** Changes in  $G'$  and  $G''$  as a function of temperature for a 7 wt/v% solution of 1P30-2h in deionised water. Gelation occurs at the temperature when  $G'$  first exceeds  $G''$ .

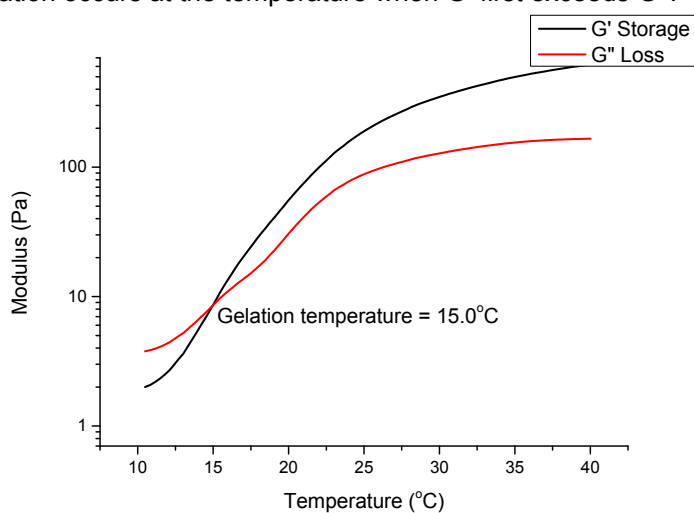

**Figure S36.** Changes in  $G'$  and  $G''$  as a function of temperature for a 7 wt/v% solution of 1P30-3h in deionised water. Gelation occurs at the temperature when  $G'$  first exceeds  $G''$ .

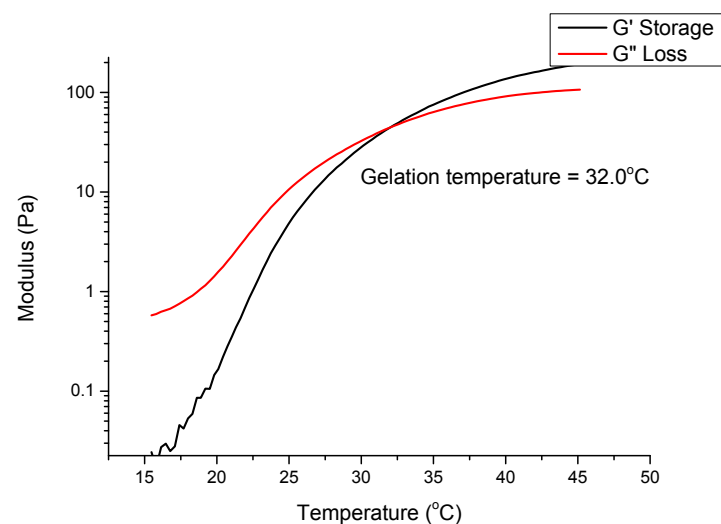

**Figure S37.** Changes in  $G'$  and  $G''$  as a function of temperature for a 7 wt/v% solution of 1P35-1h in deionised water. Gelation occurs at the temperature when  $G'$  first exceeds  $G''$ .

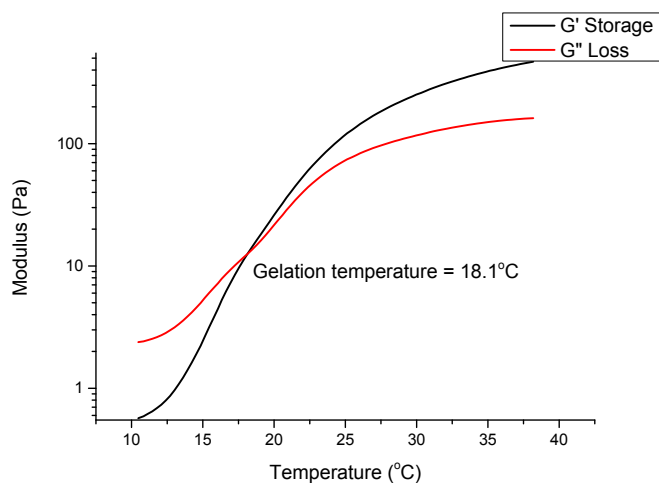

**Figure S38.** Changes in  $G'$  and  $G''$  as a function of temperature for a 7 wt/v% solution of 1P35-2h in deionised water. Gelation occurs at the temperature when  $G'$  first exceeds  $G''$

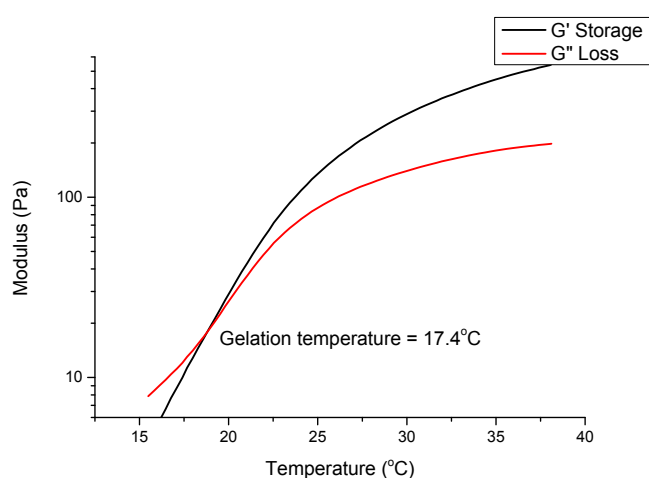

**Figure S39.** Changes in  $G'$  and  $G''$  as a function of temperature for a 7 wt/v% solution of 1P35-3h in deionised water. Gelation occurs at the temperature when  $G'$  first exceeds  $G''$ ,

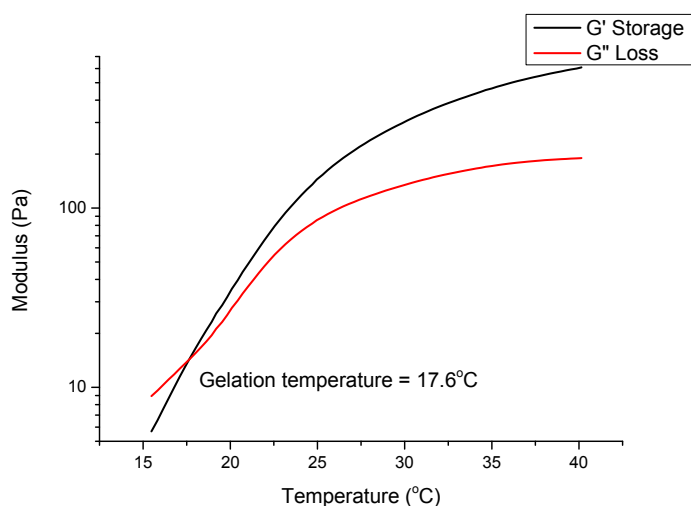

**Figure S40.** Changes in  $G'$  and  $G''$  as a function of temperature for a 7 wt/v% solution of 1P35-4h in deionised water. Gelation occurs at the temperature when  $G'$  first exceeds  $G''$ ,

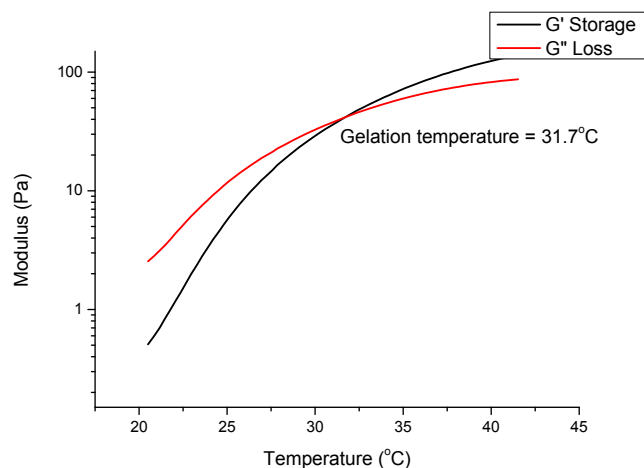

**Figure S41.** Changes in  $G'$  and  $G''$  as a function of temperature for a 7 wt/v% solution of 1P40-1h in deionised water. Gelation occurs at the temperature when  $G'$  first exceeds  $G''$ ,

## S5. Degree of Branching

### Derivation of $H_c$

The polymer structure may be written as  $(\text{HMDI} + \text{PEG} + \text{PPG} + \text{PCL})_n$ , where  $n$  = no. of repeating units making up the main polymer chain as well as its branches.

The terms  $H$ ,  $E$ ,  $P$  and  $C$  are the average mole ratios of HMDI, PEG, PPG and PCL respectively per repeating unit.

$$M_n$$

Thus,  $n = \frac{M_n}{H(168.19) + E(2050) + P(2000) + C(2000)}$ , where the numbers in parentheses represent the molecular weights of each (macromonomer) component.

Moles of excess HMDI per repeating unit  $x_H = H - E - P - C$

Total quantity of NCO-terminated branches per polymer = total quantity of excess HMDI present (as

explained in the main text) =  $n x_H = \frac{M_n}{H(168.19) + E(2050) + P(2000) + C(2000)} \times (H - E - P - C)$

$$\begin{aligned} \text{Thus, quantity of NCO-terminated branches } (H_c) &= \frac{1}{M_n} \times \\ &\frac{M_n}{H(168.19) + E(2050) + P(2000) + C(2000)} \times (H - E - P - C) \\ &= \frac{H - E - P - C}{H(168.19) + E(2050) + P(2000) + C(2000)} \end{aligned}$$

### Procedure for titration experiments to determine $\text{OH}_c$

An accurately-weighed sample of the poly(PEG/PPG/PCL urethane) polymer (typically ~0.4g) was dissolved in anhydrous DMSO (8.0 mL) at 80 °C. Separately, solutions of 4-dimethylaminopyridine (DMAP) and acetic anhydride ( $\text{Ac}_2\text{O}$ ) were prepared in anhydrous DMSO at concentrations of 50 mg/mL and 50  $\mu\text{L}/\text{mL}$  respectively. To the vigorously-stirred polymer solution was added 1 mL of DMAP and  $\text{Ac}_2\text{O}$  successively, and the reaction was left to stir at 80 °C for a further 1 hour. Thereafter, the

reaction was transferred quantitatively (washed with 3 x 5 mL DI water) to a conical flask containing chilled DI water and chilled further to ensure a homogeneous solution was obtained. Thereafter, the contents were heated to 80 °C for a further 20 minutes to ensure complete hydrolysis of Ac<sub>2</sub>O. Upon cooling of the solution to ambient temperature, 1 mL of 1wt% phenolphthalein indication was added and mixed thoroughly. The solution was titrated with 30 mM NaOH (aq) until a persistent pink coloration was observed. The volume of NaOH (aq) used was V<sub>p</sub>.

For the blank control, the procedure was repeated as above except that the polymer was substituted with 1 mL of DI water for complete hydrolysis of Ac<sub>2</sub>O. The volume of 30 mM NaOH required for titration of the resulting eventual acetic acid solution is V<sub>b</sub>.

#### Derivation of OH<sub>c</sub>

Less acetic acid (AcOH) is produced in the presence of the polymer than in the blank control reaction. The difference is equivalent to the quantity of alcohol (ROH) groups present = (V<sub>b</sub> – V<sub>p</sub>) x C, where C = concentration of NaOH (aq).

The no. of ROH groups per unit mass of polymer =  $\frac{1}{M} \times (V_b - V_p) \times C$ , where M = accurate mass of polymer sample used for titration.

As this procedure does not differentiate between OH groups on either the main polymer chain or on the branches, the OH of the main polymer chain can be taken into account by subtracting  $\frac{1}{M_n}$  from this value, to give

$$OH_c(\text{mol g}^{-1}) = \left( \frac{1}{M} \times (V_b - V_p) \times C \right) - \frac{1}{M_n}$$

In all cases, however,  $\frac{1}{M_n}$  is very small compared to the term in parentheses.

**Table S2.** Determination of quantity of branches per unit mass of each polymer investigated

| Polymer | NCO-terminated branches |      |   |        |                    |                                                                | OH-terminated branches |                        |                                                                 | Total branches/<br>(10 <sup>-4</sup> mol g <sup>-1</sup> )<br>[b] |
|---------|-------------------------|------|---|--------|--------------------|----------------------------------------------------------------|------------------------|------------------------|-----------------------------------------------------------------|-------------------------------------------------------------------|
|         | H                       | E    | P | C      | X <sub>H</sub> [a] | H <sub>c</sub> /<br>(10 <sup>-6</sup><br>mol g <sup>-1</sup> ) | V <sub>b</sub> /<br>mL | V <sub>p</sub> /<br>mL | OH <sub>c</sub> /<br>(10 <sup>-4</sup> mol<br>g <sup>-1</sup> ) |                                                                   |
| 1P30 1h | 5.45                    | 4.38 | 1 | 0.0516 | 0.0175             | 1.46                                                           | 21.1                   | 15.9                   | 4.59                                                            | 4.6                                                               |
| 1P30 2h | 5.13                    | 4.06 | 1 | 0.0548 | 0.00836            | 0.740                                                          | 21.5                   | 16.9                   | 3.69                                                            | 3.7                                                               |
| 1P30 3h | 5.52                    | 4.18 | 1 | 0.0490 | 0.292              | 25.2                                                           | 21.1                   | 16.3                   | 4.45                                                            | 4.7                                                               |
| 1P35 1h | 5.64                    | 4.48 | 1 | 0.0522 | 0.106              | 8.65                                                           | 18.8                   | 16.6                   | 1.61                                                            | 1.7                                                               |
| 1P35 2h | 5.62                    | 4.21 | 1 | 0.0458 | 0.371              | 31.9                                                           | 20.9                   | 18.1                   | 2.28                                                            | 2.6                                                               |
| 1P35 3h | 5.67                    | 4.19 | 1 | 0.0399 | 0.441              | 38.0                                                           | 18.8                   | 15.8                   | 2.42                                                            | 2.8                                                               |
| 1P35 4h | 5.66                    | 4.20 | 1 | 0.0414 | 0.414              | 35.5                                                           | 21.5                   | 16.4                   | 3.55                                                            | 3.9                                                               |
| 1P40 1h | 5.59                    | 4.33 | 1 | 0.0559 | 0.209              | 17.5                                                           | 21.5                   | 16.8                   | 3.63                                                            | 3.8                                                               |

[a] X<sub>H</sub> = H – E – P – C ; [b] Total branches = H<sub>c</sub> + OH<sub>c</sub>
